# Supplementary figures and images for: Resveratrol and FGF1 Synergistically Ameliorates Doxorubicin-Induced Cardiotoxicity via Activation of SIRT1-NRF2 Pathway
Source: MDPI journal article supplement (doi:10.3390/nu14194017), 2022-09-27

## Supplementary Materials

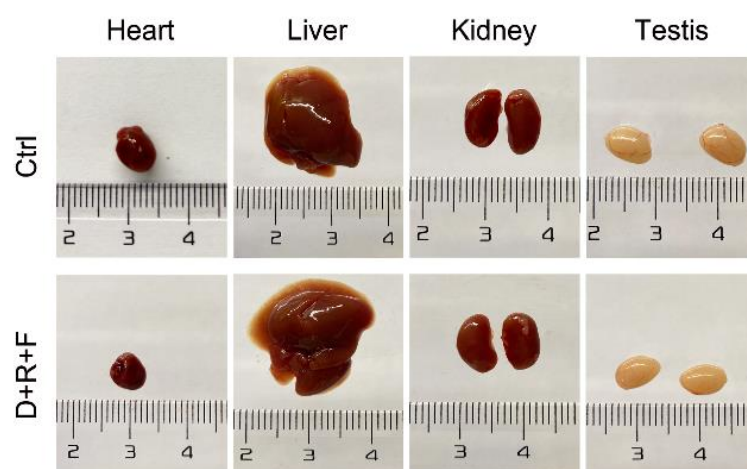

**Figure S1.** Representative different organs images.

Supplement: s1 [file s1]
